# Supplementary material
Source: publisher figshare collection journal article supplement (https://frontiersin.figshare.com/ndownloader/files/18601733)
Supplement: Supplementary file [file 18601733]

# **Fabrication of Customized Nanogel Carriers from a UV-Triggered Dynamic Self-Assembly Strategy**

Wuren Bao<sup>1</sup>, Jieran Lyu<sup>2,5</sup>, Chunlin Li<sup>3</sup>, Jifeng Zhang<sup>4</sup>, Tunan Sun<sup>3</sup>, Xing Wang<sup>5,6,\*</sup>, Jin Zhou<sup>3,\*</sup> and Dawei Li<sup>3,\*</sup>

<sup>1</sup>School of Nursing, Inner Mongolia University for Nationalities, Huolinhe Street West, Kerchin District, Tongliao, Inner Mongolia, 028000, P.R. China

<sup>2</sup>Clinical Medicine Academy of Shandong First Medical University, Taian 271016, P.R. China

<sup>3</sup>The 8th Medical Center of Chinese PLA General Hospital, Beijing 100091, P.R. China

<sup>4</sup>Department of Orthopedic Surgery, Tongliao City Hospital, Kerchin Street, Kerchin District, Tongliao, Inner Mongolia 028000, P.R. China

<sup>5</sup>Beijing National Laboratory for Molecular Sciences, State Key Laboratory of Polymer Physics & Chemistry, Institute of Chemistry, Chinese Academy of Sciences, Beijing 100190, P.R. China

<sup>6</sup>University of Chinese Academy of Sciences, Beijing 100049, P.R. China

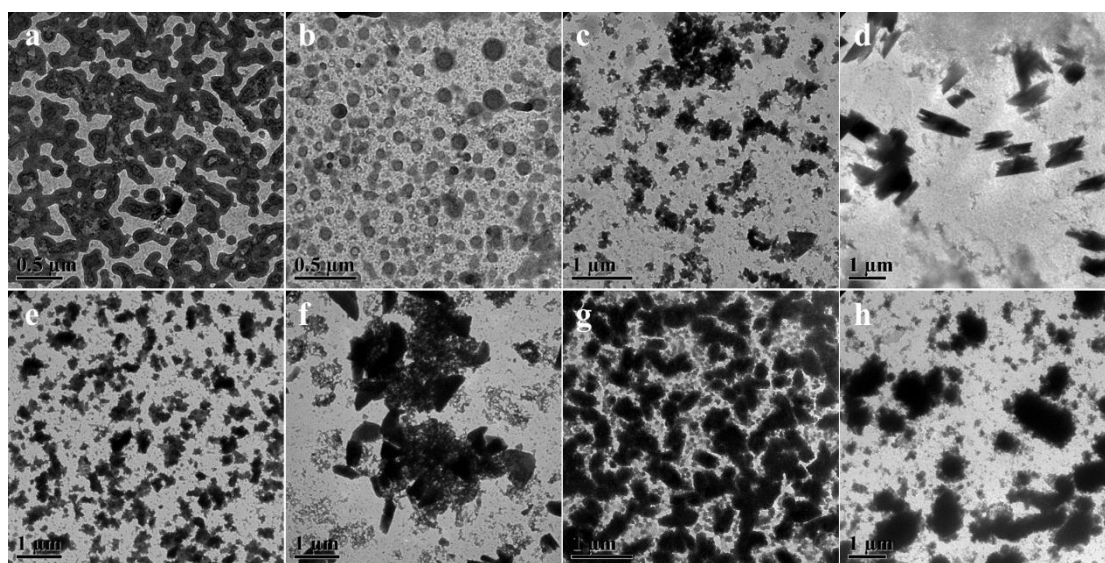

**Fig. S1** TEM images showing morphology and size evolution with a concentration of 1 mg/mL aqueous media under UV irradiation at (a) 2, (b) 6, (c) 10, (d) 12, (e) 16, (f) 28, (g) 36 and (h) 44 h.
